# Supplementary material for: Extracellular electron transfer mediated by a cytocompatible redox polymer to study the crosstalk among the mammalian circadian clock, cellular metabolism, and cellular redox state
Source: Royal Society of Chemistry journal article supplement (doi:10.1039/c9ra10023g), 2020-01-01
Supplement: c9ra10023g1.pdf [file c9ra10023g1.pdf]

## Supplementary Information

### **Extracellular electron transfer mediated by a cytocompatible redox polymer to study the crosstalk among the mammalian circadian clock, cellular metabolism, and cellular redox states**

Masahito Ishikawa,<sup>1,4\*</sup> Kazuki Kawai<sup>1</sup>, Masahiro Kaneko,<sup>2</sup> Kenya Tanaka,<sup>3</sup> Shuji Nakanishi,<sup>3,4</sup> and Katsutoshi Hori<sup>1\*</sup>

<sup>1</sup>Department of Biomolecular Engineering, Graduate School of Engineering, Nagoya University, Furo-cho, Chikusa-ku, Nagoya 464-8603, Japan

<sup>2</sup>Department of Materials Engineering, School of Engineering, The University of Tokyo, 7-3-1 Hongo, Bunkyo-ku, Tokyo 113-8656, Japan

<sup>3</sup>Graduate School of Engineering Science, Osaka University, 1-3 Machikaneyama, Toyonaka, Osaka 560-8631, Japan

<sup>4</sup>Research Center for Solar Energy Chemistry, Osaka University, 1-3 Machikaneyama, Toyonaka, Osaka 560-8631, Japan

## Supplementary figures

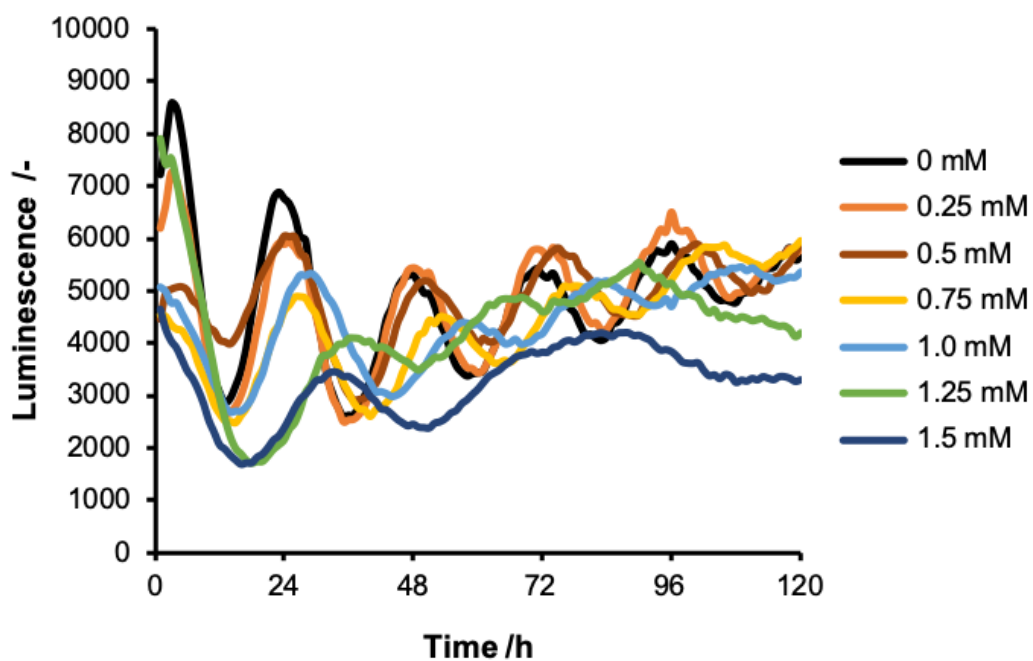

**Figure S1.** Representative curves of raw bioluminescence rhythm in U2OS cells in the presence of oxidized pMFc. Each concentration of pMFc corresponds to that of the vinyl ferrocene unit.

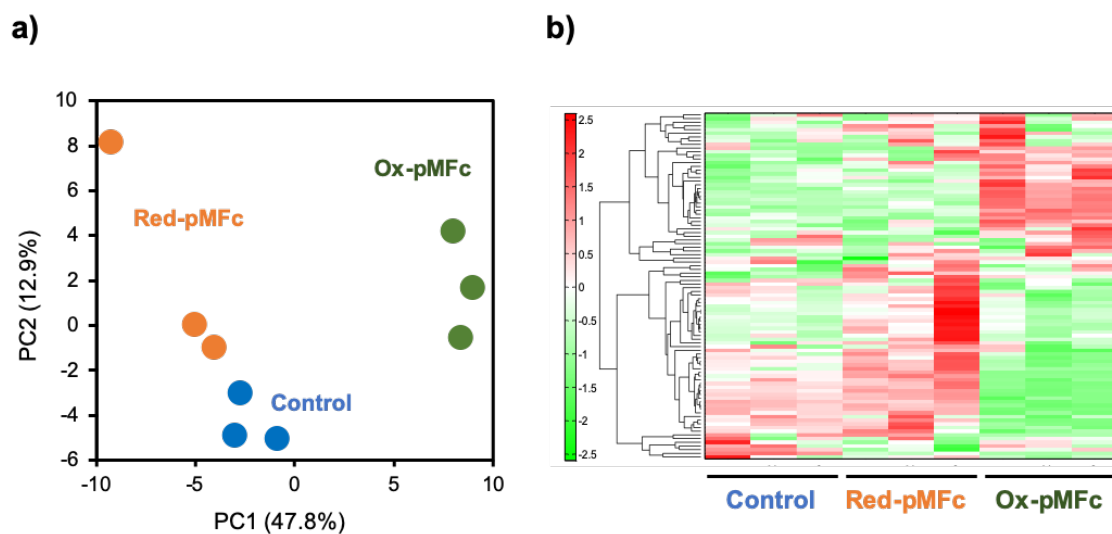

**Figure S2.** a) Principal component analysis and b) hierarchical cluster analysis of 116 metabolites extracted from U2OS cells treated with 1 mM of the oxidized form of pMFC (ox-pMFC) or 1 mM of the reduced form of pMFC (red-pMFC) and from untreated U2OS cells (control). The concentration of pMFC corresponds to that of vinyl ferrocene unit.

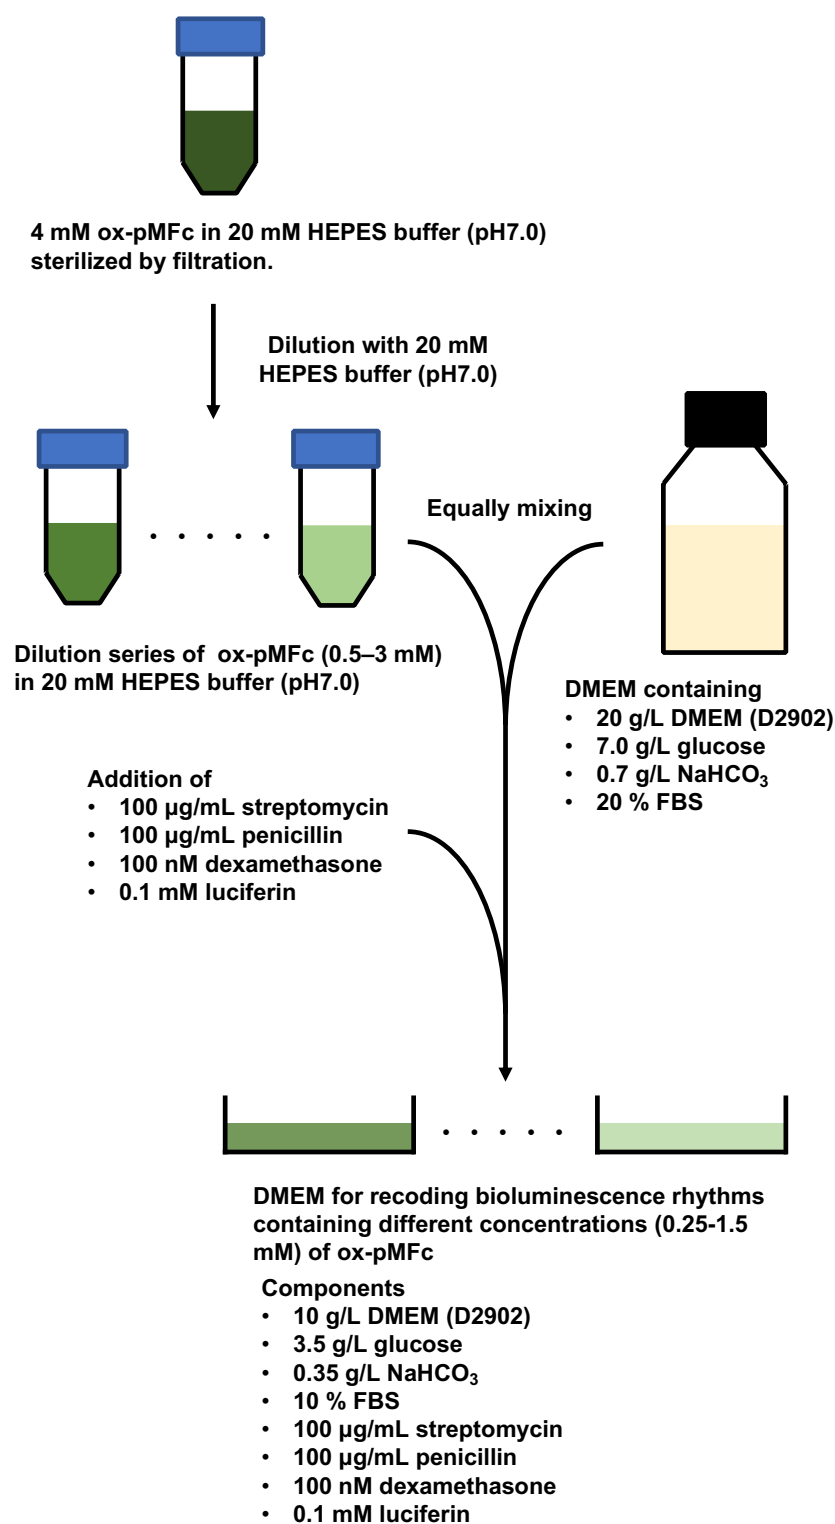

**Figure S3.** Schematic of the preparation of DMEM for recoding bioluminescence rhythm containing the different concentrations of ox-pMFC.

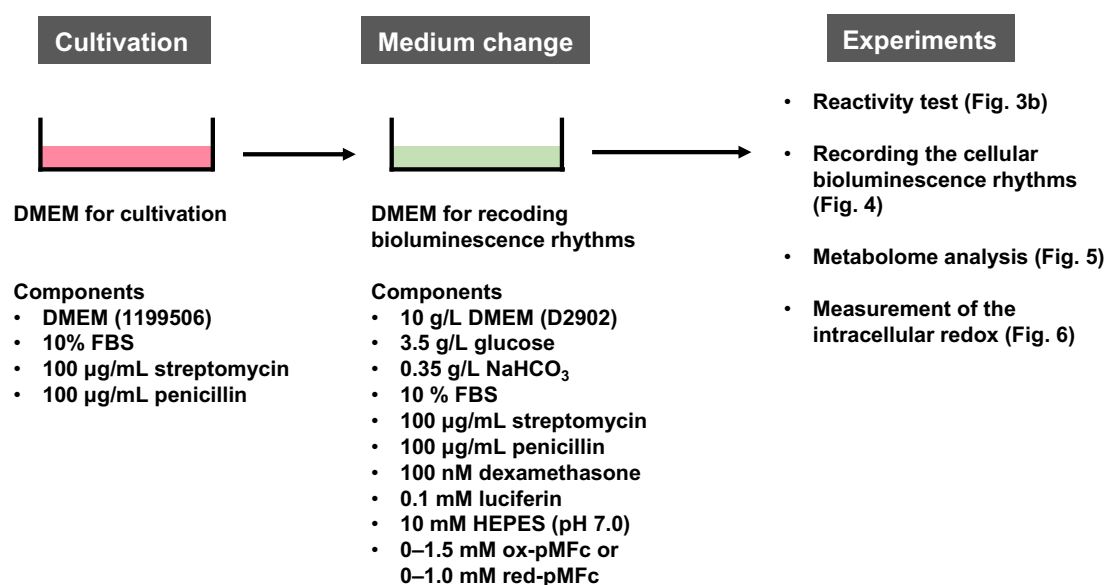

**Figure S4.** Schematic of the procedure for experiments using U2OS cells and pMFcs.
